# Supplementary material for: Lipid Headgroup Charge and Acyl Chain Composition Modulate Closure of Bacterial β-Barrel Channels
Source: MDPI journal article supplement (doi:10.3390/ijms20030674), 2019-02-05
Supplement: s1 [file s1]

# Lipid Headgroup Charge and Acyl Chain Composition Modulate Closure of Bacterial $\beta$ -Barrel Channels

Supplementary materials:

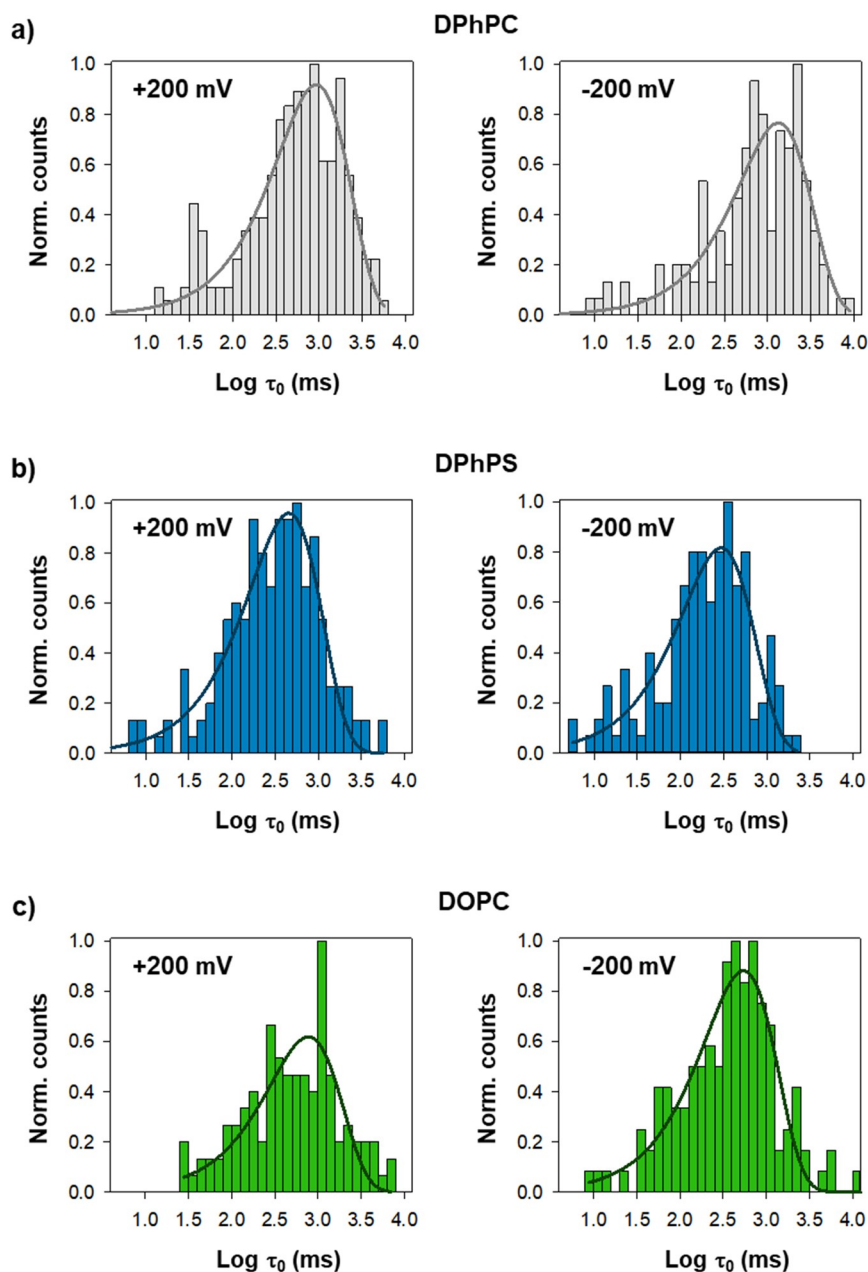

**Figure S1. Individual view of the histograms shown in Figures 3 and 4.** Logarithmically binned histograms of the time the channel spends in the open conformation when inserted in membranes composed of DPhPC (a), DPhPS (b) or DPhPC/DOPC (1/1, labelled as DOPC) (c), under a positive (left panels) or a negative (right panels) applied voltage. Solid lines are exponential fittings.

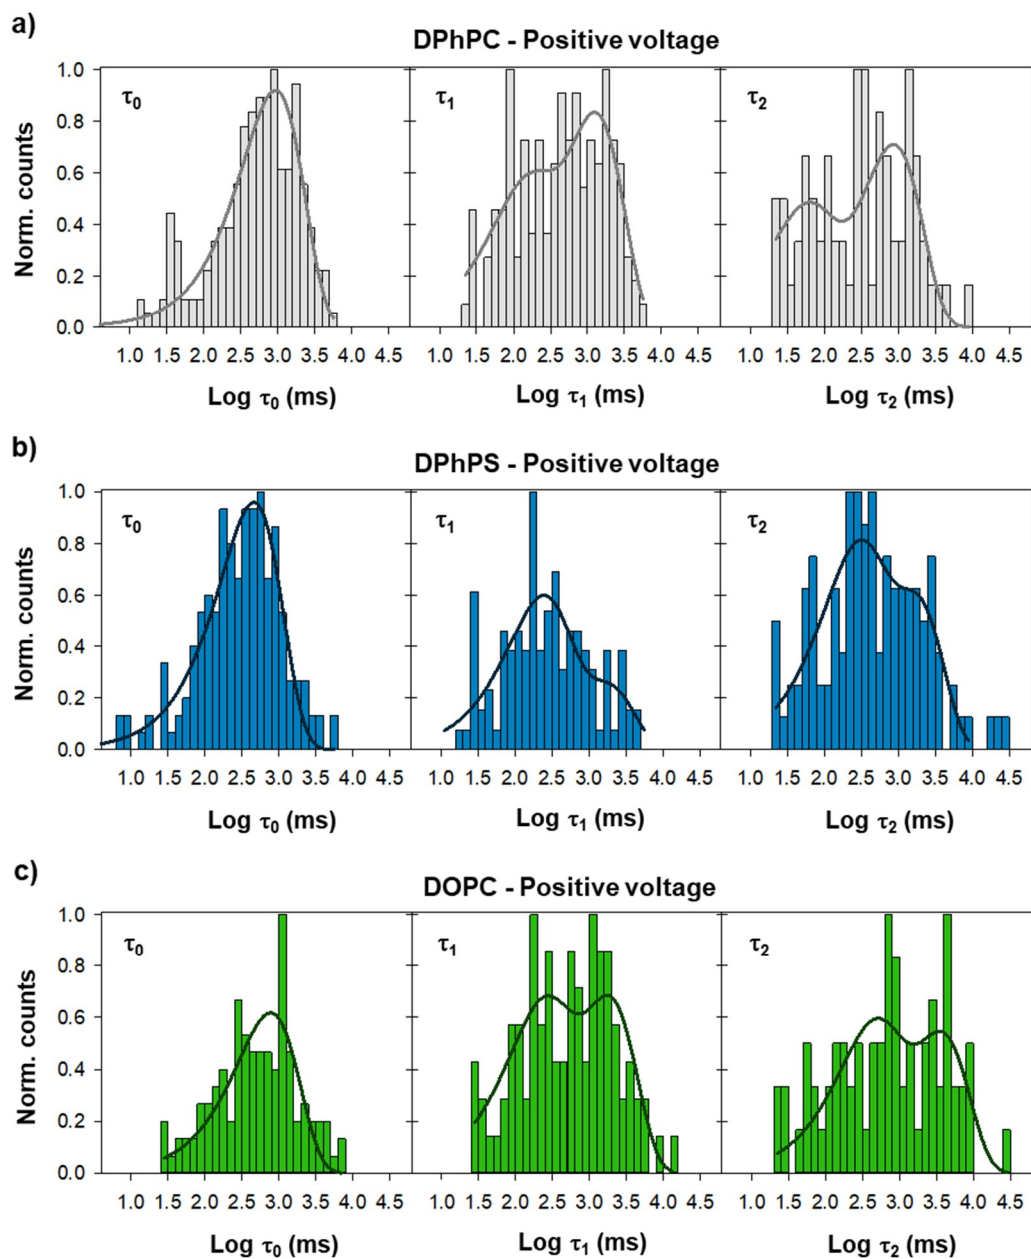

**Figure S2. Individual view of the histograms shown in Figure 5 for positive voltages.** Logarithmically binned histograms of the time the channel spends before closing the first ( $\tau_0$ ), second ( $\tau_1$ ), or third ( $\tau_2$ ) monomers under a positive applied voltage when inserted membranes composed of DPhPC (a), DPhPS (b), or DPhPC/DOPC (1/1) (c). Solid lines are exponential fittings with one ( $\tau_0$ ) or two ( $\tau_1$ ,  $\tau_2$ ) terms.

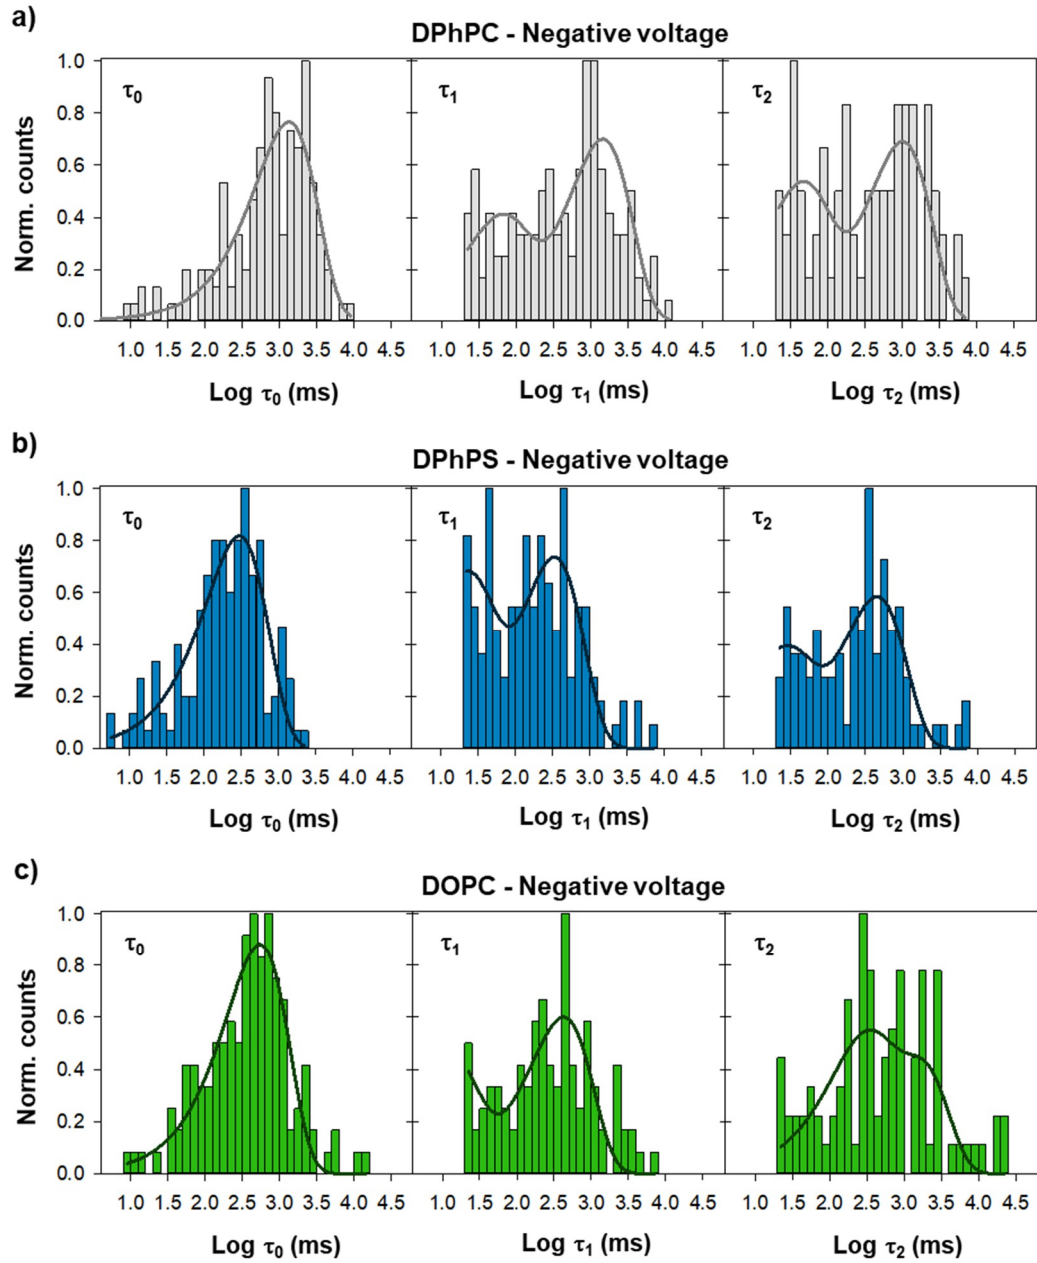

**Figure S3. Individual view of the histograms shown in Figure5 for negative voltages.** Logarithmically binned histograms of the time the channel spends before closing the first ( $\tau_0$ ), second ( $\tau_1$ ), or third ( $\tau_2$ ) monomers under a negative applied voltage when inserted membranes composed of DPhPC (a), DPhPS (b), or DPhPC/DOPC (1/1) (c). Solid lines are exponential fittings with one ( $\tau_0$ ) or two ( $\tau_1$ ,  $\tau_2$ ) terms.

### Statistical tests for significance in Figures 3c and 4c

All 6 experimental conditions (DPhPC, DPhPS, DPhPC/DOPC lipids with  $\pm 200$  mV applied voltage) were checked together for significance with a one-way ANOVA. After the test stated that there is a statistically significant difference ( $p < 0.001$ ) in the mean values among the treatment groups, a Holm-Sidak *post hoc* test was used for pair-wise comparison. Data were checked for normality and homoscedasticity with Shapiro-Wilk and Levene tests, respectively.

These are the results obtained:

#### ONE-WAY ANOVA

| Group Name   | N | Missing | Mean     | Std. Dev. | SEM    |
|--------------|---|---------|----------|-----------|--------|
| DPhPC +200mV | 3 | 0       | 941.967  | 10.894    | 6.289  |
| DPhPC -200mV | 4 | 0       | 1329.814 | 100.162   | 50.081 |
| DPhPS +200mV | 4 | 0       | 476.277  | 73.482    | 36.741 |
| DPhPS -200mV | 4 | 0       | 296.858  | 31.006    | 15.503 |
| DOPC +200mV  | 4 | 0       | 856.023  | 97.995    | 48.997 |
| DOPC -200mV  | 4 | 0       | 554.001  | 15.223    | 7.611  |

| Source of Variation | DF | SS          | MS         | F       | P      |
|---------------------|----|-------------|------------|---------|--------|
| Between Groups      | 5  | 2768940.107 | 553788.021 | 119.287 | <0.001 |
| Residual            | 17 | 78921.980   | 4642.469   |         |        |
| Total               | 22 | 2847862.087 |            |         |        |

DF = Degrees of freedom; SS = Sum of squares; MS = Mean square.

**The differences in the mean values among the treatment groups are greater than would be expected by chance; there is a statistically significant difference ( $P = <0.001$ ).**

Power of performed test with  $\alpha = 0.050$ : 1.000

All Pairwise Multiple Comparison Procedures (Holm-Sidak method):

Overall significance level = 0.05

Comparisons for factor:

| Comparison                    | Diff of Means | t      | P      | P<0.050 |
|-------------------------------|---------------|--------|--------|---------|
| DPhPC -200mV vs. DPhPS -200mV | 1032.956      | 21.440 | <0.001 | Yes     |
| DPhPC -200mV vs. DPhPS +200mV | 853.537       | 17.716 | <0.001 | Yes     |
| DPhPC -200mV vs. DOPC -200mV  | 775.813       | 16.103 | <0.001 | Yes     |

|                               |         |        |        |     |
|-------------------------------|---------|--------|--------|-----|
| DPhPC +200mV vs. DPhPS -200mV | 645.109 | 12.397 | <0.001 | Yes |
| DOPC +200mV vs. DPhPS -200mV  | 559.165 | 11.606 | <0.001 | Yes |
| DPhPC -200mV vs. DOPC +200mV  | 473.790 | 9.834  | <0.001 | Yes |
| DPhPC +200mV vs. DPhPS +200mV | 465.690 | 8.949  | <0.001 | Yes |
| DOPC +200mV vs. DPhPS +200mV  | 379.746 | 7.882  | <0.001 | Yes |
| DPhPC +200mV vs. DOPC -200mV  | 387.966 | 7.455  | <0.001 | Yes |
| DPhPC -200mV vs. DPhPC +200mV | 387.847 | 7.453  | <0.001 | Yes |
| DOPC +200mV vs. DOPC -200mV   | 302.022 | 6.269  | <0.001 | Yes |
| DOPC -200mV vs. DPhPS -200mV  | 257.143 | 5.337  | <0.001 | Yes |
| DPhPS +200mV vs. DPhPS -200mV | 179.419 | 3.724  | 0.005  | Yes |
| DPhPC +200mV vs. DOPC +200mV  | 85.944  | 1.652  | 0.220  | No  |
| DOPC -200mV vs. DPhPS +200mV  | 77.724  | 1.613  | 0.125  | No  |

#### SHAPIRO-WILK TEST FOR NORMALITY:

|               |                     |           |        |
|---------------|---------------------|-----------|--------|
| DPhPC +200mV: | W-Statistic = 0.840 | P = 0.214 | Passed |
| DPhPC -200mV: | W-Statistic = 0.881 | P = 0.341 | Passed |
| DPhPS +200mV: | W-Statistic = 0.824 | P = 0.152 | Passed |
| DPhPS -200mV: | W-Statistic = 0.956 | P = 0.755 | Passed |
| DOPC +200mV:  | W-Statistic = 0.901 | P = 0.438 | Passed |
| DOPC -200mV:  | W-Statistic = 0.805 | P = 0.112 | Passed |

A test that fails indicates that the data varies significantly from the pattern expected if the data was drawn from a population with a normal distribution.

A test that passes indicates that the data matches the pattern expected if the data was drawn from a population with a normal distribution.

#### LEVENE TEST FOR HOMOSCEDASTICITY

Equal Variance Test: Passed ( $P = 0.284$ )

A two-way ANOVA would have also been appropriate, in this case assuming that we have two separate factors affecting our experimental data: lipid and voltage polarity. The results in terms of significance between pairs are the same for the two designs.

## TWO-WAY ANOVA

| Source of Variation | DF | SS          | MS          | F       | P      |
|---------------------|----|-------------|-------------|---------|--------|
| Voltage             | 1  | 5532.559    | 5532.559    | 1.192   | 0.290  |
| Lipid               | 2  | 2077077.150 | 1038538.575 | 223.704 | <0.001 |
| Voltage x Lipid     | 2  | 489147.939  | 244573.970  | 52.682  | <0.001 |
| Residual            | 17 | 78921.980   | 4642.469    |         |        |
| Total               | 22 | 2847862.087 | 129448.277  |         |        |

The effect of different levels of Voltage depends on what level of Lipid is present. There is a statistically significant interaction between Voltage and Lipid. ( $P = <0.001$ )

Power of performed test with  $\alpha = 0.0500$ : for Voltage : 0.0666

Power of performed test with  $\alpha = 0.0500$ : for Lipid : 1.000

Power of performed test with  $\alpha = 0.0500$ : for Voltage x Lipid : 1.000

Least square means for Voltage :

| Group      | Mean    | SEM    |
|------------|---------|--------|
| Positive V | 758.089 | 20.733 |
| Negative V | 726.891 | 19.669 |

Least square means for Lipid :

| Group | Mean     | SEM    |
|-------|----------|--------|
| DPhPC | 1135.890 | 26.020 |
| DPhPS | 386.567  | 24.090 |
| DOPC  | 705.012  | 24.090 |

Least square means for Voltage x Lipid :

| Group              | Mean     | SEM    |
|--------------------|----------|--------|
| Positive V x DPhPC | 941.967  | 39.338 |
| Positive V x DPhPS | 476.277  | 34.068 |
| Positive V x DOPC  | 856.023  | 34.068 |
| Negative V x DPhPC | 1329.814 | 34.068 |
| Negative V x DPhPS | 296.858  | 34.068 |
| Negative V x DOPC  | 554.001  | 34.068 |

All Pairwise Multiple Comparison Procedures (Holm-Sidak method):

Overall significance level = 0.05

### Comparisons for factor: Voltage

| <b>Comparison</b>         | <b>Diff of Means</b> | <b>t</b> | <b>P</b> | <b>P&lt;0.050</b> |
|---------------------------|----------------------|----------|----------|-------------------|
| Positive V vs. Negative V | 31.198               | 1.092    | 0.290    | No                |

**Comparisons for factor: Lipid**

| <b>Comparison</b> | <b>Diff of Means</b> | <b>t</b> | <b>P</b> | <b>P&lt;0.050</b> |
|-------------------|----------------------|----------|----------|-------------------|
| DPhPC vs. DPhPS   | 749.323              | 21.132   | <0.001   | Yes               |
| DPhPC vs. DOPC    | 430.878              | 12.151   | <0.001   | Yes               |
| DOPC vs. DPhPS    | 318.445              | 9.347    | <0.001   | Yes               |

**Comparisons for factor: Lipid within Positive V**

| <b>Comparison</b> | <b>Diff of Means</b> | <b>t</b> | <b>P</b> | <b>P&lt;0.05</b> |
|-------------------|----------------------|----------|----------|------------------|
| DPhPC vs. DPhPS   | 465.690              | 8.949    | <0.001   | Yes              |
| DOPC vs. DPhPS    | 379.746              | 7.882    | <0.001   | Yes              |
| DPhPC vs. DOPC    | 85.944               | 1.652    | 0.117    | No               |

**Comparisons for factor: Lipid within Negative V**

| <b>Comparison</b> | <b>Diff of Means</b> | <b>t</b> | <b>P</b> | <b>P&lt;0.05</b> |
|-------------------|----------------------|----------|----------|------------------|
| DPhPC vs. DPhPS   | 1032.956             | 21.440   | <0.001   | Yes              |
| DPhPC vs. DOPC    | 775.813              | 16.103   | <0.001   | Yes              |
| DOPC vs. DPhPS    | 257.143              | 5.337    | <0.001   | Yes              |

**Comparisons for factor: Voltage within DPhPC**

| <b>Comparison</b>         | <b>Diff of Means</b> | <b>t</b> | <b>P</b> | <b>P&lt;0.05</b> |
|---------------------------|----------------------|----------|----------|------------------|
| Negative V vs. Positive V | 387.847              | 7.453    | <0.001   | Yes              |

**Comparisons for factor: Voltage within DPhPS**

| <b>Comparison</b>         | <b>Diff of Means</b> | <b>t</b> | <b>P</b> | <b>P&lt;0.05</b> |
|---------------------------|----------------------|----------|----------|------------------|
| Positive V vs. Negative V | 179.419              | 3.724    | 0.002    | Yes              |

**Comparisons for factor: Voltage within DOPC**

| <b>Comparison</b>         | <b>Diff of Means</b> | <b>t</b> | <b>P</b> | <b>P&lt;0.05</b> |
|---------------------------|----------------------|----------|----------|------------------|
| Positive V vs. Negative V | 302.022              | 6.269    | <0.001   | Yes              |
